# Supplementary material for: Determining Pneumocystis jirovecii Colonisation from Infection Using PCR-Based Diagnostics in HIV-Negative Individuals
Source: MDPI journal article supplement (doi:10.3390/diagnostics14010114), 2024-01-04
Supplement: s1 [file s1]

## Supplementary data

- Immunosuppressive drugs recorded: any chemotherapy, alkylating agents, anthracyclines, tumour necrosis factor inhibitors, methotrexate, rituximab, anti-metabolites, leflunomide, hydroxyurea, sulfasalazine, mycophenolate, calcineurin inhibitor, immunotherapy, Tyrosine kinase inhibitors, mammalian target of rapamycin (mTOR) inhibitors
- Autoimmune diseases recorded: collagenous colitis, rheumatoid arthritis, dermatomyositis, lichen planus, membranous glomerulonephritis, ulcerative colitis, microscopic polyangiitis, inflammatory myopathy, lupus, giant cell arteritis, bullous pemphigoid, paraneoplastic pemphigus, autoimmune haemophilia
- Data set

| Definite infection |    | Deceased<br>D+30 | Haem.<br>cancer | Non-<br>haem.<br>cancer | Solid<br>organ<br>transplant | Chronic<br>lung<br>disease | Haemo-<br>dialysis | Diabetes | Chronic<br>liver<br>disease | Autoimm<br>une<br>disease | Immunosu<br>pressive<br>drug<br>prescribed | Steroids<br>≥ 2 wks<br>>15mg/day | Prophylax | Fever | Dyspnoea | Cough | Hypoxia<br>( $< 95\%$ ) | Bacterial | Viral | Other<br>infective | Non-infect | Ground<br>glass | Reticular<br>opacities | Nodules | Consolidation | Other<br>contributing<br>pathology | Sample<br>type | qPCR                |                       |                     |
|--------------------|----|------------------|-----------------|-------------------------|------------------------------|----------------------------|--------------------|----------|-----------------------------|---------------------------|--------------------------------------------|----------------------------------|-----------|-------|----------|-------|-------------------------|-----------|-------|--------------------|------------|-----------------|------------------------|---------|---------------|------------------------------------|----------------|---------------------|-----------------------|---------------------|
|                    |    |                  |                 |                         |                              |                            |                    |          |                             |                           |                                            |                                  |           |       |          |       |                         |           |       |                    |            |                 |                        |         |               |                                    |                |                     |                       |                     |
| M                  | 63 | 0                | 1               | 0                       | 0                            | 0                          | 0                  | 0        | 0                           | 0                         | 0                                          | 1                                | 0         | 0     | 1        | 1     | 0                       | 1         | 0     | 0                  | 0          | 1               | 0                      | 0       | 0             | 1                                  | BAL            | 1.2x10 <sup>4</sup> |                       |                     |
| M                  | 69 | 0                | 0               | 1                       | 0                            | 0                          | 0                  | 0        | 0                           | 0                         | 0                                          | 1                                | 1         | 0     | 1        | 1     | 0                       | 0         | 0     | 0                  | 0          | 0               | 1                      | 0       | 0             | 0                                  | 0              | BAL                 | 7.7x10 <sup>4</sup>   |                     |
| M                  | 56 | 0                | 1               | 0                       | 0                            | 0                          | 0                  | 0        | 0                           | 0                         | 1                                          | 1                                | 0         | 0     | 1        | 1     | 1                       | 0         | 0     | 0                  | 0          | 0               | 1                      | 0       | 1             | 0                                  | 0              | BAL                 | 3.5x10 <sup>5</sup>   |                     |
| M                  | 37 | 0                | 1               | 0                       | 0                            | 0                          | 0                  | 0        | 0                           | 0                         | 0                                          | 1                                | 0         | 1     | 1        | 1     | 1                       | 1         | 0     | 0                  | 0          | 0               | 1                      | 0       | 0             | 0                                  | 0              | BAL                 | 1.4x10 <sup>5</sup>   |                     |
| M                  | 57 | 0                | 1               | 0                       | 0                            | 1                          | 0                  | 0        | 0                           | 1                         | 0                                          | 1                                | 0         | 1     | 1        | 1     | 0                       | 0         | 0     | 0                  | 0          | 0               | 0                      | 0       | 0             | 0                                  | 0              | 1                   | BAL                   | 3.2x10 <sup>5</sup> |
| F                  | 51 | 1                | 0               | 1                       | 0                            | 0                          | 0                  | 0        | 0                           | 0                         | 0                                          | 0                                | 0         | 0     | 1        | 1     | 1                       | 1         | 0     | 0                  | 0          | 0               | 0                      | 0       | 0             | 0                                  | 1              | BAL                 | 1.7x10 <sup>6</sup>   |                     |
| F                  | 38 | 0                | 0               | 1                       | 0                            | 0                          | 0                  | 1        | 0                           | 1                         | 0                                          | 1                                | 0         | 1     | 1        | 1     | 1                       | 1         | 0     | 0                  | 0          | 0               | 0                      | 0       | 0             | 0                                  | 1              | BAL                 | 1.9x10 <sup>7</sup>   |                     |
| F                  | 47 | 0                | 0               | 0                       | 0                            | 1                          | 0                  | 0        | 0                           | 0                         | 0                                          | 0                                | 0         | 0     | 0        | 1     | 0                       | 0         | 0     | 0                  | 0          | 0               | 1                      | 0       | 1             | 0                                  | 1              | BAL                 | 8.2x10 <sup>3</sup>   |                     |
| F                  | 53 | 0                | 0               | 1                       | 0                            | 0                          | 0                  | 0        | 0                           | 0                         | 0                                          | 1                                | 1         | 0     | 1        | 0     | 0                       | 0         | 0     | 0                  | 0          | 0               | 1                      | 0       | 0             | 1                                  | 0              | BAL                 | 1.9x10 <sup>4</sup>   |                     |
| M                  | 63 | 1                | 1               | 0                       | 0                            | 0                          | 0                  | 0        | 1                           | 0                         | 1                                          | 1                                | 1         | 0     | 0        | 1     | 1                       | 1         | 0     | 0                  | 0          | 0               | 0                      | 0       | 0             | 1                                  | 0              | BAL                 | 4.8x10 <sup>4</sup>   |                     |
| F                  | 76 | 0                | 0               | 1                       | 0                            | 0                          | 0                  | 0        | 0                           | 0                         | 0                                          | 1                                | 0         | 0     | 0        | 1     | 1                       | 0         | 0     | 0                  | 0          | 0               | 1                      | 0       | 0             | 0                                  | 1              | Sputum              | 3.6x10 <sup>4</sup>   |                     |
| M                  | 76 | 1                | 1               | 0                       | 0                            | 1                          | 0                  | 0        | 0                           | 0                         | 0                                          | 1                                | 0         | 0     | 1        | 1     | 1                       | 1         | 0     | 0                  | 0          | 0               | 1                      | 1       | 0             | 1                                  | 0              | Sputum              | 3.4x10 <sup>6</sup>   |                     |
| F                  | 44 | 0                | 0               | 0                       | 0                            | 1                          | 0                  | 0        | 0                           | 0                         | 1                                          | 1                                | 0         | 0     | 1        | 1     | 1                       | 1         | 0     | 0                  | 0          | 0               | 1                      | 0       | 0             | 1                                  | 1              | Sputum              | 2.5 x 10 <sup>4</sup> |                     |
| F                  | 56 | 0                | 0               | 0                       | 0                            | 1                          | 0                  | 0        | 0                           | 0                         | 0                                          | 0                                | 0         | 0     | 0        | 1     | 1                       | 1         | 0     | 0                  | 0          | 0               | 1                      | 0       | 1             | 1                                  | 1              | Sputum              | 2.0x10 <sup>4</sup>   |                     |
| M                  | 64 | 0                | 1               | 0                       | 0                            | 0                          | 0                  | 0        | 0                           | 0                         | 0                                          | 1                                | 0         | 1     | 0        | 1     | 0                       | 0         | 0     | 0                  | 0          | 0               | 1                      | 0       | 0             | 1                                  | 1              | Sputum              | 1.0x10 <sup>5</sup>   |                     |
| F                  | 70 | 0                | 1               | 0                       | 0                            | 0                          | 0                  | 0        | 0                           | 0                         | 0                                          | 1                                | 0         | 0     | 1        | 0     | 0                       | 0         | 0     | 0                  | 0          | 0               | 1                      | 0       | 0             | 0                                  | 1              | Sputum              | 1.0x10 <sup>5</sup>   |                     |
| M                  | 68 | 1                | 0               | 0                       | 0                            | 1                          | 0                  | 0        | 0                           | 0                         | 1                                          | 1                                | 0         | 0     | 1        | 1     | 1                       | 1         | 0     | 0                  | 0          | 0               | 0                      | 1       | 1             | 1                                  | 1              | Sputum              | 2.5x10 <sup>6</sup>   |                     |
| F                  | 53 | 0                | 1               | 0                       | 0                            | 0                          | 0                  | 0        | 0                           | 0                         | 0                                          | 1                                | 0         | 1     | 1        | 1     | 0                       | 1         | 0     | 0                  | 0          | 0               | 1                      | 0       | 0             | 1                                  | 1              | Sputum              | 4.6x10 <sup>6</sup>   |                     |
| F                  | 18 | 0                | 1               | 0                       | 0                            | 0                          | 0                  | 1        | 0                           | 0                         | 0                                          | 1                                | 0         | 1     | 0        | 1     | 0                       | 0         | 0     | 0                  | 0          | 0               | 1                      | 0       | 0             | 0                                  | 1              | Sputum              | 6.9x10 <sup>4</sup>   |                     |
| F                  | 61 | 0                | 0               | 1                       | 0                            | 1                          | 0                  | 0        | 0                           | 0                         | 0                                          | 1                                | 0         | 0     | 1        | 0     | 1                       | 0         | 0     | 0                  | 0          | 0               | 1                      | 0       | 0             | 1                                  | 0              | Sputum              | 1.5x10 <sup>5</sup>   |                     |
| F                  | 66 | 0                | 0               | 1                       | 0                            | 1                          | 0                  | 0        | 0                           | 0                         | 0                                          | 1                                | 0         | 0     | 0        | 1     | 1                       | 1         | 0     | 0                  | 0          | 0               | 1                      | 0       | 0             | 1                                  | 1              | Sputum              | 9.0x10 <sup>5</sup>   |                     |
| M                  | 63 | 1                | 0               | 1                       | 0                            | 0                          | 0                  | 0        | 1                           | 0                         | 1                                          | 1                                | 0         | 0     | 0        | 1     | 1                       | 1         | 0     | 0                  | 0          | 0               | 0                      | 0       | 0             | 1                                  | 1              | Sputum              | 1.9x10 <sup>7</sup>   |                     |
| M                  | 75 | 0                | 0               | 1                       | 0                            | 0                          | 0                  | 0        | 0                           | 0                         | 0                                          | 1                                | 0         | 0     | 1        | 1     | 1                       | 1         | 0     | 0                  | 0          | 0               | 1                      | 0       | 0             | 1                                  | 1              | Sputum              | 2.4x10 <sup>5</sup>   |                     |
| M                  | 78 | 0                | 0               | 1                       | 0                            | 1                          | 0                  | 1        | 0                           | 1                         | 0                                          | 1                                | 0         | 0     | 1        | 1     | 1                       | 1         | 0     | 0                  | 0          | 0               | 1                      | 0       | 1             | 1                                  | 1              | Sputum              | 5.3x10 <sup>5</sup>   |                     |
| M                  | 87 | 0                | 0               | 0                       | 0                            | 0                          | 0                  | 1        | 0                           | 1                         | 0                                          | 1                                | 0         | 0     | 1        | 1     | 1                       | 1         | 0     | 0                  | 0          | 0               | 0                      | 0       | 0             | 1                                  | 1              | Sputum              | 6.9x10 <sup>6</sup>   |                     |
| M                  | 74 | 0                | 0               | 1                       | 0                            | 0                          | 0                  | 0        | 0                           | 0                         | 0                                          | 0                                | 1         | 0     | 0        | 1     | 0                       | 1         | 0     | 0                  | 0          | 0               | 0                      | 0       | 0             | 1                                  | 1              | Sputum              | 3.1x10 <sup>7</sup>   |                     |
| M                  | 77 | 0                | 1               | 1                       | 0                            | 0                          | 0                  | 0        | 0                           | 0                         | 0                                          | 0                                | 1         | 0     | 1        | 1     | 0                       | 1         | 0     | 0                  | 0          | 0               | 0                      | 0       | 0             | 1                                  | 1              | Sputum              | 2.6x10 <sup>6</sup>   |                     |
| M                  | 74 | 0                | 1               | 0                       | 0                            | 1                          | 0                  | 0        | 0                           | 0                         | 0                                          | 0                                | 0         | 0     | 0        | 1     | 1                       | 1         | 0     | 0                  | 0          | 0               | 0                      | 0       | 0             | 0                                  | 1              | Sputum              | 2.7x10 <sup>4</sup>   |                     |

| Possible infection |     | Deceased<br>D+30 | Haem.<br>cancer | Non-<br>haem.<br>cancer | Solid<br>organ<br>transplant | Chronic<br>lung<br>disease | Haemo-<br>dialysis | Diabetes | Chronic<br>liver<br>disease | Autoimm<br>une<br>disease | Immunosu<br>ppressive<br>drug<br>prescribed | Steroids<br>≥ 2 wks<br>>15mg/day | Prophylax | Fever | Dyspnoea | Cough | Hypoxia<br>(<br>95%) | Bacterial | Viral | Other<br>infective | Non-infect | Ground<br>glass | Reticular<br>opacities | Nodules | Consolidation | Other<br>contributing<br>pathology | Sample<br>type | qPCR   |                       |
|--------------------|-----|------------------|-----------------|-------------------------|------------------------------|----------------------------|--------------------|----------|-----------------------------|---------------------------|---------------------------------------------|----------------------------------|-----------|-------|----------|-------|----------------------|-----------|-------|--------------------|------------|-----------------|------------------------|---------|---------------|------------------------------------|----------------|--------|-----------------------|
| Sex                | Age |                  |                 |                         |                              |                            |                    |          |                             |                           |                                             |                                  |           |       |          |       |                      |           |       |                    |            |                 |                        |         |               |                                    |                |        |                       |
| F                  | 30  | 1                | 1               | 0                       | 0                            | 0                          | 0                  | 0        | 0                           | 0                         | 0                                           | 1                                | 1         | 1     | 0        | 1     | 1                    | 1         | 1     | 0                  | 0          | 1               | 1                      | 0       | 0             | 1                                  | 1              | BAL    | 3.0x10 <sup>3</sup>   |
| M                  | 65  | 1                | 1               | 0                       | 0                            | 1                          | 0                  | 1        | 0                           | 1                         | 0                                           | 1                                | 0         | 0     | 1        | 1     | 0                    | 0         | 0     | 0                  | 0          | 1               | 0                      | 0       | 0             | 0                                  | 1              | BAL    | 3.7x10 <sup>3</sup>   |
| M                  | 62  | 0                | 1               | 0                       | 0                            | 0                          | 0                  | 0        | 0                           | 0                         | 0                                           | 1                                | 0         | 0     | 1        | 1     | 1                    | 0         | 1     | 1                  | 0          | 1               | 0                      | 0       | 1             | 0                                  | 0              | BAL    | 5.4x10 <sup>3</sup>   |
| M                  | 42  | 0                | 0               | 0                       | 0                            | 0                          | 0                  | 0        | 1                           | 1                         | 0                                           | 0                                | 0         | 0     | 0        | 1     | 0                    | 1         | 0     | 1                  | 0          | 0               | 0                      | 0       | 0             | 1                                  | 1              | BAL    | 2.5 x 10 <sup>4</sup> |
| M                  | 69  | 1                | 0               | 0                       | 0                            | 1                          | 0                  | 0        | 0                           | 0                         | 1                                           | 1                                | 0         | 0     | 1        | 1     | 1                    | 0         | 1     | 0                  | 0          | 1               | 0                      | 0       | 0             | 0                                  | 1              | BAL    | 8.9x10 <sup>3</sup>   |
| M                  | 54  | 0                | 1               | 0                       | 0                            | 0                          | 0                  | 0        | 0                           | 0                         | 0                                           | 1                                | 0         | 0     | 1        | 1     | 1                    | 1         | 0     | 0                  | 0          | 1               | 1                      | 0       | 1             | 0                                  | 1              | BAL    | 1.2x10 <sup>4</sup>   |
| F                  | 58  | 0                | 1               | 0                       | 0                            | 0                          | 0                  | 1        | 0                           | 0                         | 0                                           | 1                                | 0         | 1     | 1        | 0     | 0                    | 0         | 1     | 0                  | 1          | 0               | 1                      | 0       | 0             | 0                                  | 1              | BAL    | 1.5x10 <sup>4</sup>   |
| M                  | 77  | 1                | 0               | 1                       | 0                            | 0                          | 0                  | 0        | 0                           | 0                         | 0                                           | 0                                | 0         | 0     | 1        | 1     | 1                    | 1         | 0     | 0                  | 0          | 1               | 1                      | 0       | 0             | 1                                  | 1              | BAL    | 4.5x10 <sup>4</sup>   |
| M                  | 73  | 0                | 0               | 1                       | 0                            | 0                          | 0                  | 0        | 0                           | 0                         | 0                                           | 0                                | 1         | 0     | 0        | 1     | 1                    | 1         | 1     | 0                  | 0          | 0               | 0                      | 0       | 1             | 0                                  | 1              | BAL    | 5.4x10 <sup>4</sup>   |
| M                  | 62  | 0                | 1               | 0                       | 0                            | 0                          | 0                  | 0        | 0                           | 0                         | 0                                           | 1                                | 0         | 0     | 0        | 1     | 1                    | 1         | 1     | 0                  | 0          | 1               | 0                      | 0       | 1             | 1                                  | 1              | BAL    | 2.8x10 <sup>5</sup>   |
| M                  | 60  | 0                | 0               | 0                       | 0                            | 0                          | 0                  | 0        | 0                           | 1                         | 1                                           | 1                                | 0         | 0     | 1        | 1     | 1                    | 1         | 1     | 0                  | 1          | 0               | 0                      | 0       | 0             | 1                                  | 0              | BAL    | 1.8x10 <sup>6</sup>   |
| M                  | 69  | 0                | 1               | 0                       | 0                            | 0                          | 0                  | 0        | 0                           | 0                         | 0                                           | 1                                | 1         | 1     | 1        | 1     | 0                    | 1         | 0     | 1                  | 0          | 0               | 1                      | 0       | 0             | 1                                  | 0              | BAL    | 2.1x10 <sup>6</sup>   |
| M                  | 68  | 0                | 1               | 0                       | 1                            | 0                          | 1                  | 0        | 0                           | 0                         | 0                                           | 1                                | 1         | 0     | 1        | 1     | 1                    | 1         | 1     | 1                  | 0          | 0               | 0                      | 0       | 0             | 1                                  | 1              | BAL    | 3.7x10 <sup>6</sup>   |
| F                  | 71  | 0                | 0               | 1                       | 0                            | 1                          | 0                  | 0        | 0                           | 0                         | 0                                           | 1                                | 1         | 0     | 0        | 1     | 1                    | 1         | 1     | 1                  | 0          | 0               | 1                      | 0       | 0             | 1                                  | 1              | Sputum | 1.6x10 <sup>4</sup>   |
| F                  | 79  | 0                | 0               | 1                       | 0                            | 1                          | 0                  | 0        | 0                           | 0                         | 0                                           | 1                                | 0         | 0     | 1        | 1     | 0                    | 1         | 0     | 0                  | 0          | 1               | 1                      | 0       | 0             | 0                                  | 1              | Sputum | 1.8x10 <sup>4</sup>   |
| F                  | 52  | 0                | 0               | 1                       | 0                            | 0                          | 0                  | 0        | 0                           | 0                         | 0                                           | 1                                | 1         | 0     | 0        | 1     | 0                    | 0         | 0     | 0                  | 1          | 0               | 1                      | 0       | 0             | 0                                  | 1              | Sputum | 3.5x10 <sup>4</sup>   |
| F                  | 61  | 0                | 0               | 1                       | 0                            | 0                          | 0                  | 0        | 0                           | 0                         | 0                                           | 0                                | 0         | 0     | 0        | 1     | 1                    | 1         | 0     | 0                  | 0          | 1               | 0                      | 0       | 0             | 1                                  | 1              | Sputum | 4.3x10 <sup>4</sup>   |
| M                  | 73  | 0                | 0               | 0                       | 0                            | 0                          | 0                  | 0        | 0                           | 0                         | 0                                           | 1                                | 0         | 0     | 0        | 1     | 1                    | 1         | 1     | 0                  | 0          | 0               | 0                      | 0       | 0             | 1                                  | 0              | Sputum | 4.9x10 <sup>4</sup>   |
| F                  | 67  | 0                | 1               | 0                       | 0                            | 0                          | 0                  | 0        | 0                           | 0                         | 0                                           | 0                                | 1         | 0     | 0        | 1     | 1                    | 1         | 1     | 0                  | 0          | 1               | 1                      | 0       | 0             | 1                                  | 0              | Sputum | 9.3x10 <sup>4</sup>   |
| M                  | 66  | 1                | 0               | 1                       | 0                            | 0                          | 0                  | 0        | 1                           | 0                         | 0                                           | 0                                | 0         | 0     | 0        | 1     | 1                    | 1         | 0     | 1                  | 0          | 0               | 1                      | 1       | 0             | 0                                  | 1              | Sputum | 1.1x10 <sup>5</sup>   |
| M                  | 62  | 0                | 0               | 1                       | 0                            | 1                          | 0                  | 1        | 0                           | 0                         | 0                                           | 1                                | 0         | 0     | 1        | 1     | 1                    | 1         | 1     | 0                  | 0          | 0               | 1                      | 0       | 0             | 0                                  | 1              | Sputum | 1.2x10 <sup>5</sup>   |
| F                  | 75  | 0                | 1               | 0                       | 0                            | 0                          | 0                  | 0        | 1                           | 0                         | 0                                           | 1                                | 1         | 0     | 1        | 1     | 1                    | 1         | 0     | 1                  | 0          | 0               | 1                      | 0       | 0             | 0                                  | 1              | Sputum | 1.4x10 <sup>5</sup>   |
| M                  | 76  | 1                | 0               | 0                       | 0                            | 1                          | 0                  | 0        | 0                           | 0                         | 1                                           | 1                                | 0         | 0     | 0        | 1     | 1                    | 1         | 0     | 0                  | 0          | 1               | 0                      | 0       | 0             | 0                                  | 1              | Sputum | 1.7x10 <sup>5</sup>   |
| F                  | 72  | 0                | 0               | 0                       | 0                            | 0                          | 0                  | 0        | 0                           | 0                         | 0                                           | 1                                | 1         | 0     | 0        | 1     | 1                    | 1         | 0     | 1                  | 0          | 1               | 0                      | 0       | 0             | 0                                  | 0              | Sputum | 2.9x10 <sup>5</sup>   |
| M                  | 65  | 1                | 0               | 1                       | 0                            | 1                          | 0                  | 0        | 0                           | 0                         | 0                                           | 0                                | 0         | 0     | 1        | 1     | 1                    | 1         | 0     | 0                  | 0          | 1               | 1                      | 0       | 0             | 1                                  | 0              | Sputum | 5.7x10 <sup>5</sup>   |
| M                  | 73  | 0                | 0               | 1                       | 0                            | 1                          | 0                  | 0        | 0                           | 0                         | 0                                           | 1                                | 0         | 0     | 0        | 1     | 0                    | 0         | 0     | 0                  | 0          | 1               | 1                      | 0       | 1             | 1                                  | 1              | Sputum | 9.9x10 <sup>5</sup>   |
| M                  | 64  | 0                | 0               | 1                       | 0                            | 0                          | 0                  | 0        | 0                           | 0                         | 0                                           | 1                                | 0         | 0     | 0        | 1     | 0                    | 0         | 0     | 0                  | 0          | 1               | 1                      | 0       | 1             | 0                                  | 1              | Sputum | 1.0x10 <sup>6</sup>   |
| F                  | 75  | 0                | 0               | 1                       | 0                            | 0                          | 0                  | 0        | 0                           | 0                         | 0                                           | 0                                | 0         | 0     | 0        | 1     | 0                    | 1         | 1     | 1                  | 0          | 0               | 0                      | 0       | 0             | 0                                  | 1              | Sputum | 5.9x10 <sup>6</sup>   |
| M                  | 77  | 1                | 0               | 1                       | 0                            | 0                          | 0                  | 0        | 0                           | 0                         | 0                                           | 1                                | 0         | 0     | 0        | 1     | 1                    | 1         | 0     | 1                  | 0          | 1               | 1                      | 0       | 0             | 0                                  | 1              | Sputum | 1.6x10 <sup>7</sup>   |
| M                  | 70  | 0                | 0               | 1                       | 0                            | 1                          | 0                  | 0        | 0                           | 0                         | 0                                           | 0                                | 1         | 0     | 0        | 1     | 1                    | 1         | 0     | 0                  | 0          | 1               | 1                      | 0       | 0             | 0                                  | 1              | Sputum | 4.6x10 <sup>7</sup>   |

| Colonisation |  | Deceased D+30</ |
|--------------|--|-----------------|
|--------------|--|-----------------|
